# Supplementary material
Source: PubMed Central journal article supplement (PMC5352159)
Supplement: NIHMS824793-supplement-Supplemental_figures.pdf [file NIHMS824793-supplement-Supplemental_figures.pdf]

**Figure S1**

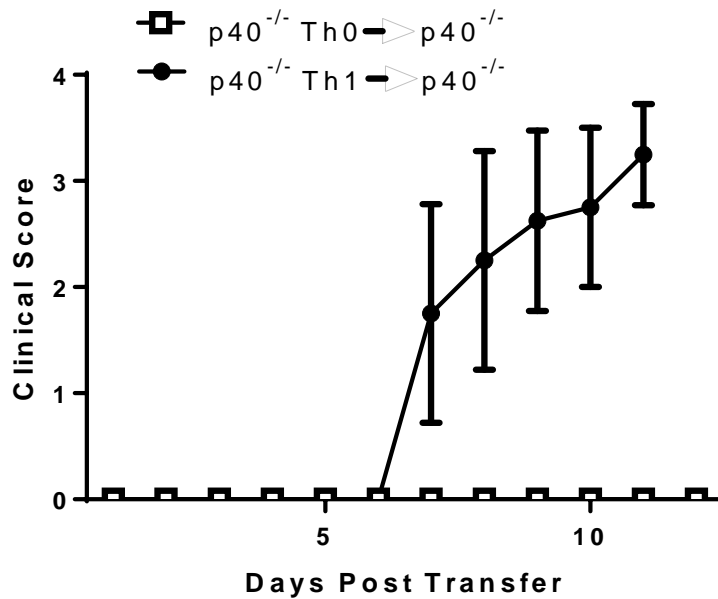

**Figure S1 – MOG-primed T cells derived from IL-12p40<sup>-/-</sup> donors fail to acquire encephalitogenic properties following ex vivo under neutral conditions.**

LNC from MOG/CFA-immunized IL-12p40<sup>-/-</sup> mice were cultured for 4 days with antigen under Th1 (IL-12 and IFN- $\gamma$ ) or neutral Th0 (anti-IL-12p40) polarizing conditions. Purified CD4<sup>+</sup> T cells were then purified and adoptively transferred into naïve IL-12p40<sup>-/-</sup> hosts. n=3-4 mice per group. Data are shown as mean  $\pm$  SEM.

**Figure S2**

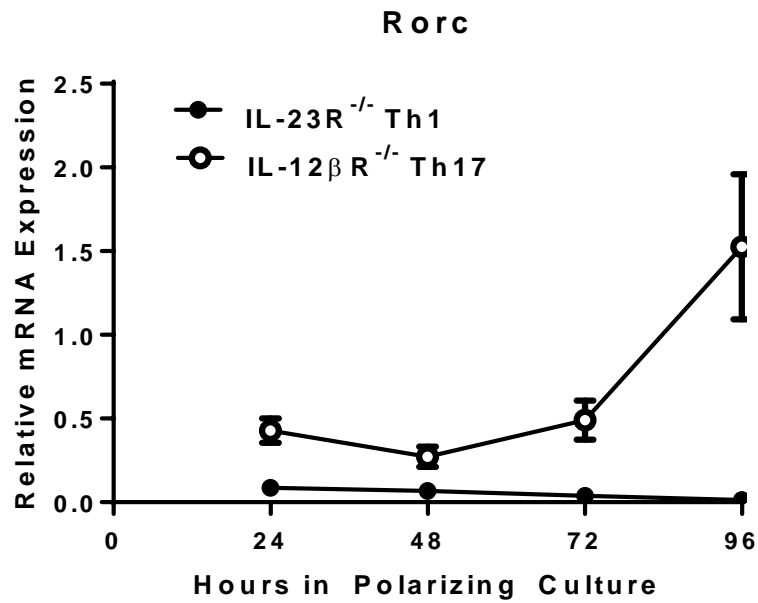

**Figure S2 – Rorc expression during polarizing culture**

LNC harvested from MOG/CFA-immunized IL-23R<sup>-/-</sup> or IL-12Rβ2<sup>-/-</sup> mice were cultured with antigen under Th1 or Th17 polarizing conditions, respectively. Cultured cells were collected at the indicated time points for RNA extraction. *Rorc* expression was measured by quantitative RT-PCR and normalized to *gapdh*. Replicates reflect separate cultures from pooled mice, and data are shown as mean ± SEM.

## Figure S3

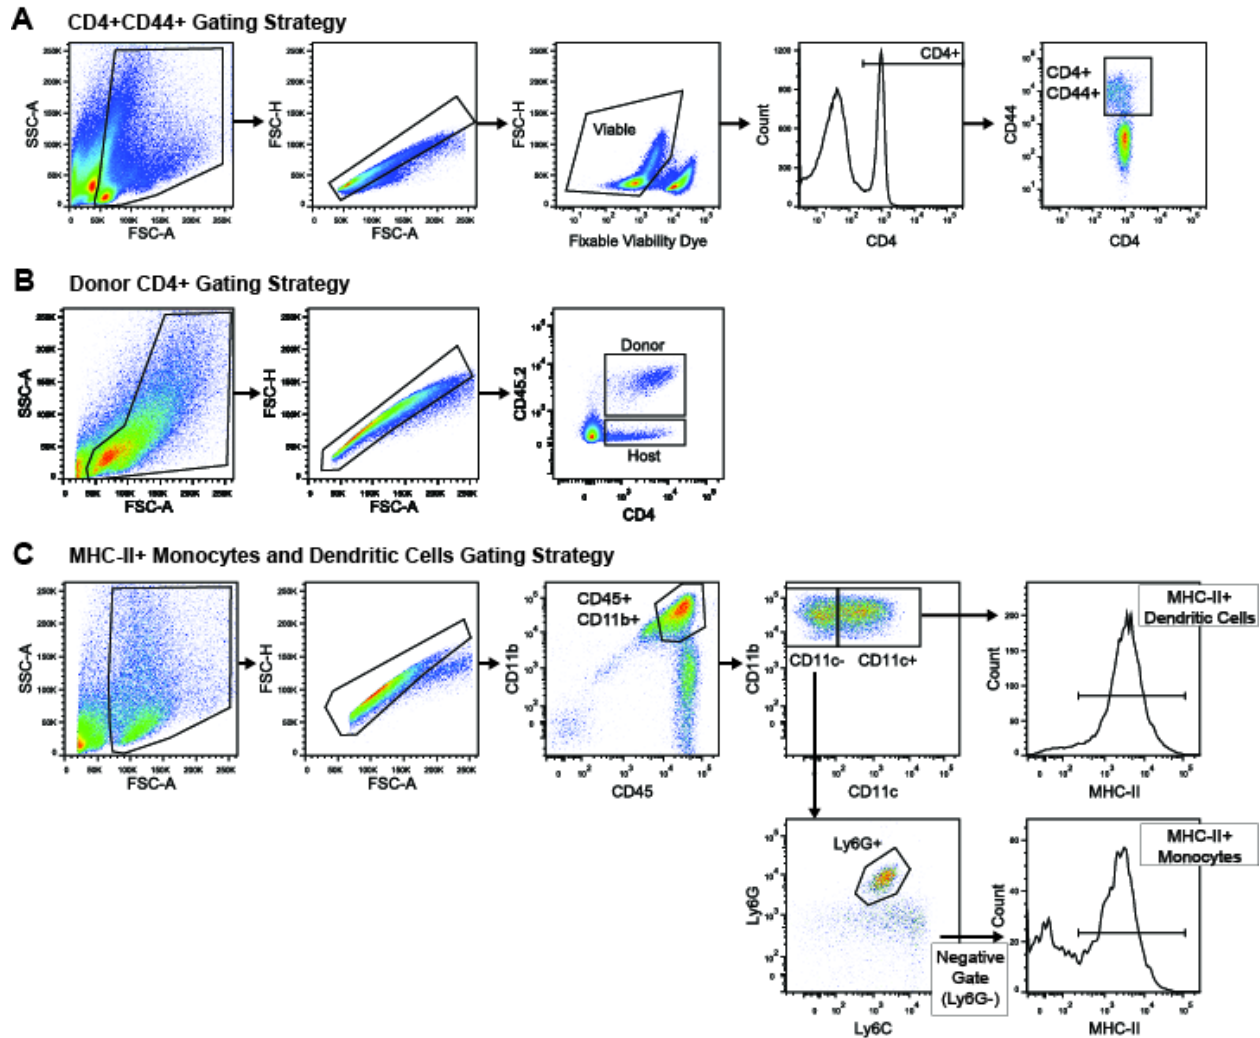

### Figure S3 – Gating strategies for flow cytometry

**(A)** Gating strategy for CD4<sup>+</sup>CD44<sup>+</sup> T cells analyzed post-culture. Following doublet exclusion, CD44<sup>+</sup> cells are identified among viable CD4<sup>+</sup> T cells. **(B)** Gating strategy for donor CD4<sup>+</sup> T cells isolated from the CNS. Following doublet exclusion, CD4<sup>+</sup> donor cells are distinguished from host cells by expression of CD45.2. **(C)** Gating strategy for MHC-II<sup>+</sup> monocytes and dendritic cells. Following doublet exclusion, CD45<sup>+</sup>CD11b<sup>+</sup> myeloid cells are assessed for expression of CD11c. Dendritic cells are identified as CD11c<sup>+</sup>. Neutrophils are excluded from the CD11c<sup>-</sup> population by gating out Ly6G<sup>+</sup> cells; CD11c<sup>-</sup> Ly6G<sup>-</sup> cells are classified as monocytes.
